# Supplementary material
Source: publisher figshare collection journal article supplement (https://gsapubs.figshare.com/ndownloader/files/36537174)
Supplement: Supplementary file 1 [file 36537174]

## Sheet: Sheet1
Supplementary Table S2 40Ar/39Ar step heating data for muscovite from the deformed rocks along the Kanggur-Huangshan Shear Zone
Run-ID	36Ar [fA]	%1s	37Ar [fA]	%1s	38Ar [fA]	%1s	39Ar [fA]	%1s	40Ar [fA]	%1s	40Ar(r)	39Ar(k)	Age	± 2s	K/Ca	± 2s
											(%)	(%)	(Ma)
Muscovite (Sample 18KH-68) J= 0.00695499 ± 0.00000348
GIG02A16WCZ-S03	16.0494	1.03685	-0.0481651	269.731	28.5918	0.803029	1862.27	0.251216	44408.4	0.0103474	89.1867	4.66127	249.456	1.32125	2635.31	706.909
GIG02A16WCZ-S04	15.5887	1.03949	0.268303	66.9822	36.2642	0.826759	2381.17	0.267013	55189.4	0.114015	91.5427	5.96008	248.902	1.44686	4969.96	6658.03
GIG02A16WCZ-S05	11.5704	1.11141	0.682601	42.8763	33.4357	1.27825	2187.93	0.300425	49870.7	0.213284	93.0484	5.4764	248.812	1.8016	1794.96	1539.26
GIG02A16WCZ-S07	10.3007	1.13151	0.229313	113.61	32.0013	1.2058	2141.51	0.27569	48494.3	0.154628	93.633	5.36021	248.747	1.53866	5229.73	11883
GIG02A16WCZ-S08	8.54037	1.20869	0.417401	67.797	25.7392	1.59862	1702.86	0.274675	38655.4	0.164574	93.3788	4.26227	248.683	1.57083	2284.62	3097.83
GIG02A16WCZ-S09	9.78909	1.19752	0.610999	55.827	30.0216	1.645	1967.77	0.292314	44641.6	0.207559	93.4282	4.92533	248.664	1.75286	1803.52	2013.74
GIG02A16WCZ-S11	8.00553	1.16596	0.100175	244.352	26.0485	1.33239	1753.01	0.260806	39623	0.112892	93.9424	4.38779	249.082	1.38413	9799.67	47891.4
GIG02A16WCZ-S12	7.68382	1.22975	0.226463	116.692	22.988	1.67434	1525.45	0.262031	34672	0.123545	93.3585	3.8182	248.927	1.42787	3772.15	8803.63
GIG02A16WCZ-S13	6.01155	1.34452	0.19646	135.08	19.843	1.99163	1324.12	0.257785	29858.7	0.109605	93.9637	3.31427	248.589	1.37679	3774.33	10196.7
GIG02A16WCZ-S15	5.57556	1.30062	-0.131868	141.866	17.9519	1.55837	1229.64	0.254616	27721.9	0.0637999	93.9696	3.0778	248.551	1.28659	902.738	342.018
GIG02A16WCZ-S16	5.58861	1.28943	0.00595513	3382.1	17.6532	1.61856	1192.22	0.254767	26904	0.0625459	93.7727	2.98412	248.286	1.28789	112112	7.58349e+06
GIG02A16WCZ-S17	5.92462	1.34601	0.122822	165.221	19.1117	1.59274	1284.54	0.255235	28953.8	0.0745247	93.8653	3.21521	248.247	1.30828	5856.77	19353.3
GIG02A16WCZ-S19	7.90515	1.15225	-0.0755239	233.4	25.0764	1.10638	1696.68	0.252891	38351.4	0.0520286	93.8205	4.24679	248.79	1.25731	1369.09	514.44
GIG02A16WCZ-S20	7.14894	1.22335	0.0863642	237.343	22.3976	1.28486	1503.01	0.254454	33954.5	0.0733754	93.6887	3.76204	248.332	1.29647	9745.77	46261.8
GIG02A16WCZ-S21	8.28821	1.21417	0.191658	108.452	27.937	1.13048	1878.63	0.257303	42310.8	0.0895933	94.1261	4.70221	248.705	1.32526	5489.1	11906.2
GIG02A16WCZ-S24	7.02892	1.19183	-0.209418	69.937	22.7845	1.014	1559.74	0.252092	35121.4	0.0142203	93.9992	3.90404	248.343	1.22702	1956.45	751.347
GIG02A16WCZ-S25	8.61517	1.14185	-0.187167	79.909	29.4396	0.870785	2008.93	0.251224	45189.6	0.029488	94.2824	5.02835	248.803	1.22286	2484.67	998.303
GIG02A16WCZ-S26	8.2077	1.14211	-0.0166205	1043.7	27.3043	0.976555	1849.64	0.252269	41606.5	0.0460346	94.0847	4.62966	248.316	1.24099	1702.52	708.209
GIG02A16WCZ-S28	8.37288	1.1143	-0.298347	43.5035	27.4745	0.837567	1886.95	0.251287	42373.9	0.011049	94.0748	4.72304	247.899	1.21298	2199.49	782.617
GIG02A16WCZ-S29	9.43431	1.09264	-0.240496	54.4288	31.3309	0.772036	2147.19	0.250885	47956.9	0.0141745	94.1007	5.37442	246.708	1.20447	162695	6.80654e+06
GIG02A16WCZ-S30	10.5066	1.07821	-0.183061	74.6061	26.8421	0.844227	1806.01	0.251643	40637.4	0.0150624	92.2556	4.52045	243.869	1.22771	16354.4	86753.3
GIG02A16WCZ-S32	9.88519	1.09982	-0.0116564	1250.59	23.3633	1.01115	1547.87	0.251937	35065.8	0.0154166	91.5585	3.87431	243.685	1.2469	1784.94	622.286
GIG02A16WCZ-S33	9.44568	1.15733	-0.0275506	531.545	15.4672	1.37083	991.438	0.255764	23041.1	0.0142188	87.737	2.48157	239.815	1.37426	1323.15	540.183
GIG02A16WCZ-S34	7.71956	1.13606	0.00561423	2426.3	8.64804	2.24165	523.439	0.271535	12728.2	0.021287	81.8713	1.31017	234.498	1.65876	52211.2	2.5336e+06
Muscovite (Sample 17KH-01) J= 0.00728309 ± 0.00000364
GIG02A5WCZ-S03	5.51068	2.22547	0.694786	7.16444	5.26443	1.35225	310.614	0.50257	9231.79	0.0275819	82.1618	5.39147	296.003	3.82715	250.356	35.9614
GIG02A5WCZ-S04	8.70111	2.0983	3.12686	2.37316	19.3505	1.03553	1290.72	0.499544	32927.3	0.0271169	92.0889	22.4036	285.61	2.81302	231.16	11.212
GIG02A5WCZ-S05	3.94818	2.46054	1.72004	3.47466	10.1392	1.18604	680.12	0.499481	16804.8	0.0243176	92.9631	11.8051	279.723	2.7679	221.429	15.546
GIG02A5WCZ-S07	2.48861	3.04837	1.25981	4.72128	6.97693	1.28595	478.621	0.500878	11703.4	0.0173641	93.6285	8.30763	278.87	2.80429	212.752	20.202
GIG02A5WCZ-S08	1.70338	4.14972	0.980385	6.04437	5.11425	1.38227	352.102	0.502094	8552.97	0.0255057	94.0308	6.11159	278.27	2.92732	201.122	24.3969
GIG02A5WCZ-S09	1.91194	3.56428	1.20702	4.56871	5.58391	1.30087	384.595	0.506783	9371.87	0.0905754	93.8862	6.67559	278.689	2.922	178.433	16.4042
GIG02A5WCZ-S11	1.71848	3.74769	1.22667	4.4104	5.09916	1.44233	347.336	0.50184	8449.29	0.0284816	93.9049	6.02885	278.294	2.88093	158.566	14.077
GIG02A5WCZ-S12	1.48898	4.32314	1.02482	5.73673	4.03956	1.63743	272.826	0.502423	6674.79	0.0318814	93.3174	4.73555	278.149	3.04721	149.082	17.1703
GIG02A5WCZ-S13	1.71169	3.96565	0.994408	5.55583	3.79102	1.65271	249.612	0.50347	6231.27	0.0358517	91.7772	4.33262	279.059	3.19362	140.569	15.6835
GIG02A5WCZ-S15	1.77785	3.77622	0.870049	5.64632	3.20855	1.69542	206.963	0.504461	5323.76	0.0385062	90.0092	3.59235	281.79	3.43158	133.21	15.1028
GIG02A5WCZ-S16	1.99369	3.55369	0.793167	6.4915	2.58672	2.08409	185.459	0.504086	4882.61	0.041247	87.7885	3.21908	281.328	3.69043	130.939	17.051
GIG02A5WCZ-S17	1.59895	3.98888	0.984993	5.27901	2.49785	2.11192	177.69	0.505182	4584.62	0.0422351	89.5664	3.08423	281.295	3.58591	101.022	10.7146
GIG02A5WCZ-S19	1.76258	3.73164	0.65101	7.86543	2.17871	2.41054	127.445	0.510117	3417.09	0.0539336	84.5819	2.21211	276.431	4.37706	109.628	17.2816
GIG02A5WCZ-S20	2.12916	3.23269	0.79234	6.5227	2.54613	2.17509	150.33	0.507186	4054.98	0.0464464	84.3056	2.60934	277.133	4.06191	106.248	13.9023
GIG02A5WCZ-S21	2.74537	2.88305	1.10747	4.9724	3.47441	1.74123	203.813	0.503917	5630.21	0.036887	85.4244	3.53767	286.795	3.75024	103.06	10.3016
GIG02A5WCZ-S23	3.25429	2.66996	1.04537	5.11816	2.87961	1.95856	159.52	0.505917	4658.17	0.0418408	79.1271	2.76886	281.258	4.54324	85.454	8.78999
GIG02A5WCZ-S24	3.83669	2.46003	0.775826	6.51944	2.43707	2.14803	117.038	0.512034	3835.87	0.049933	70.1268	2.03148	279.879	6.09563	84.4792	11.0491
GIG02A5WCZ-S25	3.82682	2.53471	0.660082	7.46736	1.72125	3.09978	66.4167	0.536569	2574.75	0.0709431	55.6208	1.15282	263.771	10.3584	56.3462	8.43685
Muscovite (Sample 18K-65) J= 0.00719942 ± 0.00000360
GIG02A8WCZ-S03	4.74785	1.62401	0.33115	37.5754	26.4278	0.908987	1797.33	0.35082	38909.6	0.0381884	96.33	4.5699	252.95	1.69273	3039.42	2284.25
GIG02A8WCZ-S04	3.60405	1.82013	0.3856	29.8867	48.2774	0.752395	3484.02	0.359914	73722.5	0.0298854	98.5121	8.85849	252.851	1.70947	5059.78	3024.63
GIG02A8WCZ-S05	2.72036	2.05321	0.296363	36.9716	55.4591	0.741322	4015.96	0.373997	84521.5	0.119129	99.0105	10.211	252.769	1.856	7588.47	5611.44
GIG02A8WCZ-S07	2.24762	2.84347	0.592706	34.6997	54.9156	0.837255	3955.41	0.375674	83084.2	0.148522	99.1637	10.057	252.672	1.91056	3737.15	2593.71
GIG02A8WCZ-S08	1.84163	3.40319	0.844749	30.2549	50.5665	0.925735	3610.41	0.393029	75667.9	0.197792	99.2448	9.17984	252.338	2.0791	2393.41	1448.37
GIG02A8WCZ-S09	1.63357	3.8535	0.861603	30.138	46.2938	0.977954	3292.07	0.392192	68884.7	0.201358	99.2634	8.37042	252.002	2.08135	2139.68	1289.82
GIG02A8WCZ-S11	1.22591	4.3376	0.37186	49.4691	36.2635	0.941564	2605.97	0.358467	54550.4	0.100867	99.3004	6.62596	252.183	1.75947	3924.45	3882.88
GIG02A8WCZ-S12	0.998918	5.13759	0.498478	39.5459	30.1127	1.13121	2149.28	0.356455	44971.8	0.102968	99.3082	5.46476	252.105	1.75462	2414.54	1909.78
GIG02A8WCZ-S13	1.01243	4.84218	0.437877	41.7074	29.2195	1.0747	2090.97	0.355756	43764.5	0.0906718	99.2807	5.31651	252.107	1.73592	2674.14	2230.71
GIG02A8WCZ-S15	0.717119	6.705	0.177481	76.3849	22.2569	1.07927	1609.99	0.350498	33671.8	0.0371319	99.3354	4.09357	252.058	1.67092	5079.97	7760.74
GIG02A8WCZ-S16	0.519088	8.42474	0.159562	90.5251	17.3018	1.2716	1249.15	0.350929	26097.2	0.0289374	99.3773	3.17608	251.907	1.67293	4384.01	7937.31
GIG02A8WCZ-S17	0.640417	7.67645	0.22267	59.0162	18.7463	1.17761	1342.2	0.35076	28034.2	0.028585	99.2893	3.41267	251.64	1.672	3375.53	3984.29
GIG02A8WCZ-S19	0.562691	7.68042	0.124833	99.1002	16.3989	1.18343	1181.93	0.35124	24666.5	0.0188185	99.2901	3.00518	251.449	1.66991	5302.12	10508.9
GIG02A8WCZ-S20	0.630927	7.01142	0.157222	79.2629	18.3594	1.1335	1319.5	0.350765	27550.3	0.0186677	99.2875	3.35497	251.552	1.66537	4699.85	7450.54
GIG02A8WCZ-S21	0.797557	5.45312	0.39436	34.6415	22.0752	1.05546	1581.92	0.350356	33030.7	0.0252787	99.2504	4.02219	251.473	1.65989	2246.36	1556.42
GIG02A8WCZ-S23	0.780302	6.77324	0.397733	35.5221	23.2487	1.06006	1653.23	0.350322	34428.6	0.0198511	99.2946	4.2035	250.958	1.65863	2327.71	1653.78
GIG02A8WCZ-S24	0.879644	5.16604	0.189701	59.0886	23.1776	0.922045	1660.68	0.350256	34666.7	0.0129146	99.2137	4.22245	251.328	1.65527	4902.35	5793.56
GIG02A8WCZ-S25	0.622426	7.07251	-0.0221346	491.54	10.2582	1.52552	729.758	0.355108	15264.5	0.0254329	98.754	1.85548	250.713	1.71638	2438.15	3676.66
Notes: Data with gray color are not used for the plateau age calculations
